# Supplementary material for: Bilayer hydrogel microneedles with mild photothermal effect promote infectious skin regeneration
Source: Royal Society of Chemistry journal article supplement (doi:10.1039/d5tb00319a), 2025-01-01
Supplement: d5tb00319a1.pdf [file d5tb00319a1.pdf]

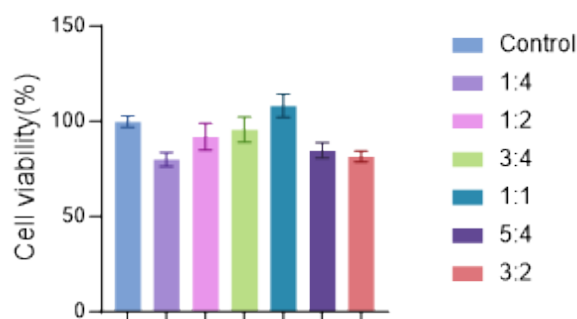

Figure S1. Effect of SC hydrogels with different mass ratios (Cu<sup>2+</sup>:SA) on L929 proliferation

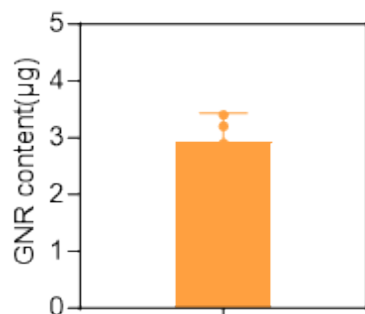

Figure S2. GNR content in FG MN

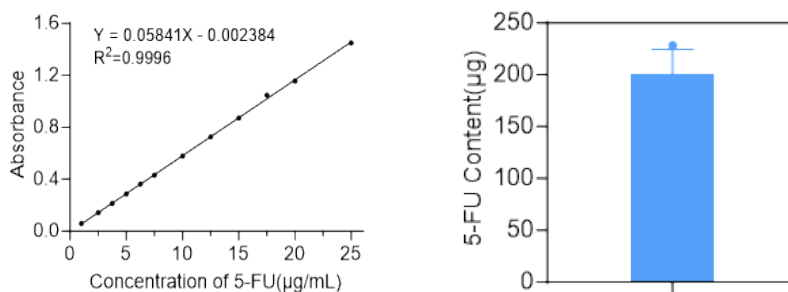

Figure S3. Standard curve of 5-FU and 5-FU content in FG MN

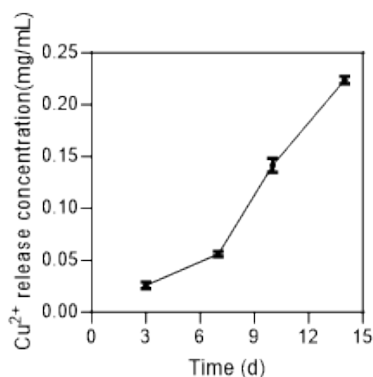

Figure S4. Release of Cu<sup>2+</sup> in FG MN on days 3, 7, 10 and 14.

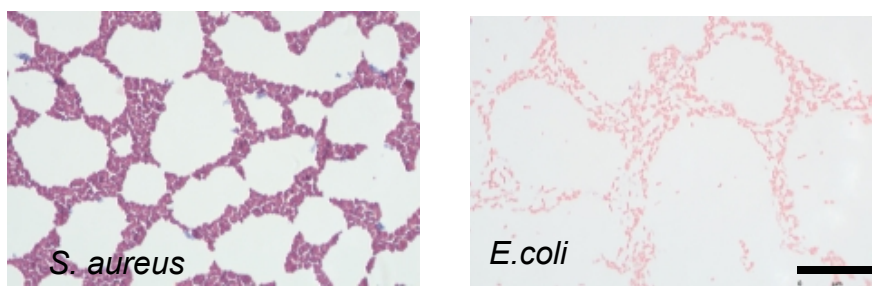

Figure S5. Gram stain of the Gram-positive bacterium *S. aureus* and the Gram-negative bacterium *E. coli* (scale bar = 25 $\mu$ m)

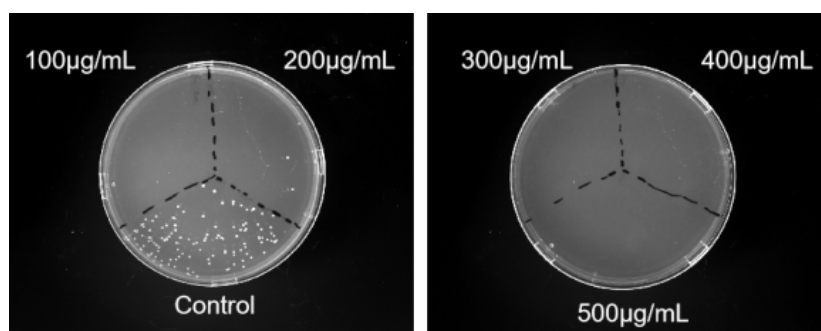

Figure S6. The killing effect of different concentrations of 5-FU on *S. aureus*
